# Supplementary material for: Pan-Cancer Analysis Shows TP53 Mutations Modulate the Association of NOX4 with Genetic Programs of Cancer Progression and Clinical Outcome
Source: MDPI journal article supplement (doi:10.3390/antiox10020235), 2021-02-04
Supplement: s1 [file s1]

## Supplementary Files

Table S1. Genes associated with EMT, ECM, migration, angiogenesis and cellular junctions and their functions in cancer (for Fig. 4).

### (A) Epithelial-to-Mesenchymal Transition

| Gene Name                                    | Abbreviation | Ref.   | Function and Characteristics                                                                                                                                      |
|----------------------------------------------|--------------|--------|-------------------------------------------------------------------------------------------------------------------------------------------------------------------|
| Alpha-smooth muscle actin                    | ACTA2        | [1, 2] | Required for lung cancer metastasis and progression of other carcinomas.                                                                                          |
| Neucleoprotein AHNAK                         | AHNAK        | [3, 4] | Upregulated in partial-EMT or mesenchymal cells. Knockdown of AHNAK reduces cell migration in mesothelioma cell lines.                                            |
| Bone morphogenic protein 1                   | BMP1         | [5]    | Involved in matrix assembly.                                                                                                                                      |
| Caldesmon 1                                  | CALD1        | [4, 6] | Overexpressed in mesenchymal cells. Calcium sensitive, regulates smooth muscle contraction.                                                                       |
| N-Cadherin                                   | CDH2         | [7]    | Activated in EMT via SNAIL or bHLH pathway and overexpression is a hallmark of EMT. The cadherin switch from E to N triggers loss of epithelial cell association. |
| Collagen 1 A2                                | COL1A2       | [4, 7] | Driven by SNAIL, activated in EMT.                                                                                                                                |
| Collagen 3 A1                                | COL3A1       | [7]    | Driven by SNAIL, activated in EMT.                                                                                                                                |
| Collagen 5 A2                                | COL5A2       | [7]    | Driven by SNAIL, activated in EMT.                                                                                                                                |
| Fibronectin                                  | FN1          | [6, 7] | Activated in EMT via SNAIL or bHLH pathway. A part of the extracellular matrix. Canonical indicator of EMT.                                                       |
| Forkhead box protein C2                      | FOXC2        | [8]    | Indirect repressor of E-cadherin, which is an epithelial marker.                                                                                                  |
| G protein subunit gamma 11                   | GNG11        | [9]    | Maybe an indicator of EMT. Differentially expressed in EMT meta-analysis.                                                                                         |
| Insulin like growth factor binding protein 4 | IGFBP4       | [10]   | Overexpression leads to tumor growth and EMT phenotype in renal cell carcinoma.                                                                                   |
| Integrin alpha subunit 5                     | ITGA5        | [11]   | May promote tumor invasiveness and cell migration.                                                                                                                |
| Integrin alpha V                             | ITGAV        | [11]   | Receptor for ECM, i.e. FN1, VTN, and MMP.                                                                                                                         |
| Matrix metalloprotease 2                     | MMP2         | [7]    | Driven by SNAIL, activated in EMT.                                                                                                                                |
| Matrix metalloprotease 3                     | MMP3         | [7]    | Driven by SNAIL, activated in EMT.                                                                                                                                |
| Matrix metalloprotease 9                     | MMP9         | [7]    | Driven by SNAIL, activated in EMT.                                                                                                                                |
| Moesin                                       | MSN          | [7]    | Driven by SNAIL, activated in EMT. Likely to be involved in connecting cytoskeletal                                                                               |

|                                                                        |          |             |                                                                                                                       |
|------------------------------------------------------------------------|----------|-------------|-----------------------------------------------------------------------------------------------------------------------|
|                                                                        |          |             | structures to the plasma membrane. Plays a role in proliferation, migration and adhesion of lymphoid cells.           |
| Plasminogen activator inhibitor 1                                      | SERPINE1 | [6, 7]      | Driven by SNAIL, activated in EMT. Involved in extracellular matrix organization.                                     |
| Zinc finger protein 1                                                  | SNAI1    | [7]         | Down regulates epithelial markers and upregulates mesenchymal markers.                                                |
| Zinc finger protein 2                                                  | SNAI2    | [7]         | Down regulates epithelial markers and upregulates mesenchymal markers.                                                |
| Zinc finger protein 3                                                  | SNAI3    | [7]         | Also in the zinc finger protein family, but exact role in EMT is unclear.                                             |
| Transcription factor SOX10                                             | SOX10    | [12]        | Regulates mesenchymal cell attributes. Drives EMT and contributes to stem/progenitor activities in mammary cells.     |
| Secreted protein acidic and rich in cystine                            | SPARC    | [7]         | Activated in EMT via SNAIL or bHLH. Involved in the response to growth factors and extracellular matrix organization. |
| Six Transmembrane Epithelial Antigen Of The Prostate 1                 | STEAP1   | [13, 14]    | May play a role in EMT, often up-regulated in several cancer cell lines.                                              |
| T-cell factor 7L2                                                      | TCF7L2   | [15]        | May play a role in EMT and may be influenced by SNAIL regulation.                                                     |
| Tissue inhibitor of metalloproteinase-1                                | TIMP1    | [16]        | Overexpression can induce EMT phenotypes via TWIST1.                                                                  |
| transmembrane protein with EGF like and two follistatin like domains 1 | TMEFF1   | [14]        | May suppress cancer growth but also may be a mesenchymal marker.                                                      |
| transmembrane protein 132A                                             | TMEM132A | [8, 14]     | May play a role in EMT.                                                                                               |
| Versican core protein                                                  | VCAN     | [6]         | Play a role in connecting cells to ECM, can also regulate motility growth and differentiation.                        |
| Twist-related protein 1                                                | TWIST1   | [9]         | Indirect repressor of E-cadherin, which is an epithelial phenotype.                                                   |
| Vimentin                                                               | VIM      | [9, 17, 18] | Expression can induce EMT and is a poor prognostic marker.                                                            |
| Vacuolar Protein Sorting 13 Homolog A                                  | VSP13A   | [16]        | May play a role in EMT.                                                                                               |
| Protein WNT-5A                                                         | WNT5A    | [19]        | Can act via non-canonical pathways to promote tumor cell invasion.                                                    |

#### (B) ECM and Surface Adhesion

| Gene Name | Abbreviation | Ref. | Function and Characteristics |
|-----------|--------------|------|------------------------------|
|-----------|--------------|------|------------------------------|

|                                         |          |          |                                                                                                                                                                 |
|-----------------------------------------|----------|----------|-----------------------------------------------------------------------------------------------------------------------------------------------------------------|
| Bone morphogenic protein 1              | BMP1     | [5]      | Involved in matrix assembly.                                                                                                                                    |
| Bone morphogenic protein 7              | BMP7     | [5]      | Promotes EMT in gastric and prostate cancer. May have paradoxical effects in different cancer types.                                                            |
| Collagen 1 A1                           | COL1A1   | [4, 7]   | Driven by SNAIL, activated in EMT. A normal part of the extracellular matrix.                                                                                   |
| Collagen 1 A2                           | COL1A2   | [4, 7]   | Driven by SNAIL, activated in EMT. A normal part of the extracellular matrix.                                                                                   |
| Collagen 3 A1                           | COL3A1   | [7]      | Driven by SNAIL, activated in EMT. A normal part of the extracellular matrix.                                                                                   |
| Collagen 5 A2                           | COL5A2   | [7]      | Driven by SNAIL, activated in EMT. A normal part of the extracellular matrix.                                                                                   |
| Catenin beta                            | CTNNB1   | [6]      | A part of the adherens junction as a component of the E-Cadherin-Catenin complex.                                                                               |
| Epidermal growth factor                 | EGFR     | [6, 20]  | Increases MUC1 interaction with CTNNB1. E-cadherin-mediated cell-to-cell contact can induce EGFR.                                                               |
| Fibronectin                             | FN1      | [6, 7]   | Activated in EMT via SNAIL or bHLH pathway. A part of the extracellular matrix. Canonical indicator of EMT.                                                     |
| Forkhead box protein C2                 | FOXC2    | [8]      | Indirect repressor of E-cadherin, which is an epithelial phenotype.                                                                                             |
| Integrin linked protein kinase          | ILK      | [6]      | Focal adhesion protein mediates cell architecture, adhesion and anchorage-dependent growth.                                                                     |
| Integrin alpha subunit 5                | ITGA5    | [11]     | May promote tumor invasiveness and cell migration.                                                                                                              |
| Integrin alpha V                        | ITGAV    | [11]     | Receptor for ECM, i.e. FN1, VTN, and MMP.                                                                                                                       |
| Integrin beta 1                         | ITGB1    | [6, 21]  | Core regulator of integrin-linked kinase, focal adhesion kinases and others involved in cellular adhesion. Promotes endothelial cell motility and angiogenesis. |
| Focal adhesion kinase 1                 | PTK2     | [6]      | Critical in regulating cell migration adhesion an spreading.                                                                                                    |
| Plasminogen activator inhibitor 1       | SERPINE1 | [6, 7]   | Driven by SNAIL, activated in EMT. Involved in extracellular matrix organization.                                                                               |
| Osteopontin                             | SPP1     | [22]     | Overexpression leads to cancer cell migration                                                                                                                   |
| Transforming growth factor beta 1       | TGFB1    | [23, 24] | Can induce EMT and migration of cancer cells.                                                                                                                   |
| Transforming growth factor beta 2       | TGFB2    | [6,14]   | Can induce EMT and migration of cancer cells.                                                                                                                   |
| Tissue inhibitor of metalloproteinase-1 | TIMP1    | [16]     | Overexpression can induce EMT phenotypes via TWIST1.                                                                                                            |

|                       |      |     |                                                                                                |
|-----------------------|------|-----|------------------------------------------------------------------------------------------------|
| Versican core protein | VCAN | [6] | Play a role in connecting cells to ECM, can also regulate motility growth and differentiation. |
|-----------------------|------|-----|------------------------------------------------------------------------------------------------|

(C) Cellular Migration and Motility

| Gene Name                                    | Abbreviation | Ref.    | Function and Characteristics                                                                                                                                                         |
|----------------------------------------------|--------------|---------|--------------------------------------------------------------------------------------------------------------------------------------------------------------------------------------|
| Caldesmon 1                                  | CALD1        | [4, 6]  | Overexpressed in mesenchymal cells. Calcium sensitive, regulates smooth muscle contraction.                                                                                          |
| Caveolin 1                                   | CAV1         | [25]    | Biphasic effect where CAV1 is tumor-suppressing in the early stages but tumor-promoting in the later stages of cancer.                                                               |
| Caveolin 2                                   | CAV2         | [26]    | Silencing CAV2 reduces cell proliferation, migration, and invasion in renal cell carcinoma.                                                                                          |
| Epidermal growth factor                      | EGFR         | [6, 20] | Increases MUC1 interaction with CTNNB1. E-cadherin-mediated cell-to-cell contact can induce EGFR.                                                                                    |
| Fibronectin                                  | FN1          | [6, 8]  | Activated in EMT via SNAIL or bHLH pathway. A part of the extracellular matrix. Canonical indicator of EMT.                                                                          |
| Integrin beta 1                              | ITGB1        | [6, 21] | Core regulator of integrin-linked kinase, focal adhesion kinases and others involved in cellular adhesion. Promotes endothelial cell motility and angiogenesis.                      |
| Protein jagged 1                             | JAG1         | [6]     | Enhances fibroblast growth factor-induced angiogenesis.                                                                                                                              |
| Moesin                                       | MSN          | [8]     | Driven by SNAIL, activated in EMT. Involved in connecting cytoskeletal structures to the plasma membrane. Plays a role in proliferation, migration and adhesion of lymphoid cells.   |
| Macrophage stimulating protein receptor      | MST1R        | [6]     | Signal can promote epithelial cell migration, proliferation and survival.                                                                                                            |
| Nodal homolog                                | NODAL        | [6]     | May positively regulate angiogenesis and cell-cell adhesion. Critical in embryonic development of the mesoderm.                                                                      |
| Platelet-derived growth factor receptor beta | PDGFRB       | [6]     | Essential role in embryonic development, cell proliferation and survival, differentiation, chemotaxis, migration, blood vessel formation, etc.                                       |
| Ras-related c3 botulinum toxin substrate 1   | RAC1         | [6]     | Small GTPase involved in many cellular responses including epithelial cell polarization and growth-factor dependent membrane ruffles. Mediates cell migration and adhesion assembly. |

|                                                    |       |             |                                                                                                                                          |
|----------------------------------------------------|-------|-------------|------------------------------------------------------------------------------------------------------------------------------------------|
| Signal transducer and activator of transcription 3 | STAT3 | [6]         | Mediates cellular responses in response to stimuli. May positively regulate angiogenesis and growth factor-dependent cell proliferation. |
| Vimentin                                           | VIM   | [8, 17, 18] | Expression can induce EMT and is a poor prognostic marker.                                                                               |

#### (D) Angiogenesis

| Gene Name                                     | Abbreviation | Ref. | Function and Characteristics                                                                                                                                                                                  |
|-----------------------------------------------|--------------|------|---------------------------------------------------------------------------------------------------------------------------------------------------------------------------------------------------------------|
| Angiotensinogen                               | ANG          | [6]  | Apart from regulating blood pressure, it can positively regulate endothelial cell migration,                                                                                                                  |
| Angiopoietin 1                                | ANGPT1       | [6]  | Competes and modulates ANGPT2. Regulates angiogenesis and endothelial cell survival. In migrating endothelial cells, it can induce focal adhesion complexes and stimulate angiogenesis/blood vessel maturity. |
| Angiopoietin 2                                | ANGPT2       | [6]  | In concert with VEGF facilitates endothelial cell migration and services as a permissive signal for angiogenesis.                                                                                             |
| Angiopoietin related protein 1                | ANGPTL1      | [14] | Specific for vascular endothelium and highly expressed in vascular tissue.                                                                                                                                    |
| Aminopeptidase N                              | ANPEP        | [6]  | Processes angiotensin.                                                                                                                                                                                        |
| Fibroblast growth factor 1                    | FGF1         | [6]  | It has an important role in regulating cell survival, division, angiogenesis, cell differentiation and cell migration. It can induce angiogenesis.                                                            |
| Fibroblast growth factor 2                    | FGF2         | [6]  | Potent mitogen. Can induces angiogenesis.                                                                                                                                                                     |
| Vascular endothelial growth factor receptor   | FLT1         | [6]  | May limit VEGFA binding. Regulates angiogenesis. Can promote endothelial cell proliferation, survival, and angiogenesis in adulthood (as opposed to embryonic development).                                   |
| Hypoxia inducible factor 1 alpha              | HIF1A        | [6]  | Master regulator of hypoxia response. In hypoxic environment of tumor, it can induce angiogenesis.                                                                                                            |
| Vascular endothelial growth factor receptor 2 | KDR          | [6]  | Receptor for VEGFA, VEGFC, and VEGFD. Essential regulator of angiogenesis.                                                                                                                                    |
| Neuropilin-2                                  | NRP2         | [6]  | Positive regulator of endothelial cell migration and proliferation.                                                                                                                                           |
| Placenta growth factor                        | PGF          | [6]  | Active in angiogenesis and stimulates endothelial cell proliferation and migration.                                                                                                                           |
| Thymidine phosphorylase                       | TYMP         | [6]  | Maintains integrity of blood vessels and promotes endothelial cell growth and angiogenesis.                                                                                                                   |

|                                      |       |     |                                                                                      |
|--------------------------------------|-------|-----|--------------------------------------------------------------------------------------|
| Vascular endothelial growth factor A | VEGFA | [6] | Growth factor that induces angiogenesis, vasculogenesis and endothelial cell growth. |
| Vascular endothelial growth factor B | VEGFB | [6] | Growth factor for endothelial cells.                                                 |
| Vascular endothelial growth factor C | VEGFC | [6] | Growth factor that induces angiogenesis, vasculogenesis and endothelial cell growth. |

#### (E) Adherens Junctions

| Gene Name                             | Abbreviation | Ref.        | Function and Characteristics                                                                                                                                            |
|---------------------------------------|--------------|-------------|-------------------------------------------------------------------------------------------------------------------------------------------------------------------------|
| Adherens junction-associated protein1 | AJAP1        | [14]        | Plays a role in cell adhesion and cell migration.                                                                                                                       |
| E-cadherin/<br>Cadherin-1             | CDH1         | [6, 27, 28] | Regulates cell-cell adhesions, loss during EMT, a marker of epithelial phenotype.                                                                                       |
| N-Cadherin<br>Cadherin-2              | CDH2         | [14]        | Calcium-dependent cell adhesion protein. Overexpression of N-cadherin is a hallmark of EMT.                                                                             |
| Catenin delta                         | CTNND1       | [6]         | Regulates cell adhesion properties of C,E, and N-cadherins                                                                                                              |
| Desmocollin                           | DSC1         | [14]        | Found primarily in epithelial cells where they constitute the desmosome cell-cell junction and are required for cell adhesion and desmosome formation.                  |
| Desmocollin-2                         | DSC2         | [6]         | Major component of the desmosome, which is an important cell-to-cell adhesion molecule.                                                                                 |
| Desmoglein 1                          | DSG1         | [14]        | Member of the desmoglein protein subfamily, which, along with desmocollins, are cadherin-like transmembrane glycoproteins that are major constituents of the desmosome. |
| Desmoglein 2                          | DSG2         | [14]        | Member of the desmoglein protein subfamily, which, along with desmocollins, are cadherin-like transmembrane glycoproteins that are major constituents of the desmosome. |
| Desmoglein 3                          | DSG3         | [14]        | Member of the desmoglein protein subfamily, which, along with desmocollins, are cadherin-like transmembrane glycoproteins that are major constituents of the desmosome  |
| Desmoglein 4                          | DSG4         | [14]        | Member of the desmoglein protein subfamily, which, along with desmocollins, are cadherin-like transmembrane glycoproteins that are major constituents of the desmosome. |

|                                                   |       |      |                                                                                                                                                               |
|---------------------------------------------------|-------|------|---------------------------------------------------------------------------------------------------------------------------------------------------------------|
| Junctional adhesion molecule A                    | F11R  | [6]  | Involved in epithelial tight junction formation.                                                                                                              |
| Purinergic receptor P2X 6                         | P2RX6 | [14] | Associated with VE-cadherin at adherens junctions of human umbilical vein endothelial cells.                                                                  |
| Tight-junction protein 1/ zonulin 1               | TJP1  | [14] | Acts as a tight junction adaptor protein that also regulates adherens junctions.                                                                              |
| Vegetin/ adherens junctions transmembrane protein | VEZT  | [14] | Transmembrane protein which has been localized to adherens junctions and shown to bind to myosin VIIA. The expression of VEZY is decreased in gastric cancer. |

Table S2. Markers of M1 and M2 macrophages (for Fig. 5)

| Gene Name                                       | Abbreviation | Ref.     | M1/M2 specificity |
|-------------------------------------------------|--------------|----------|-------------------|
| Scavenger receptor sys-rich type 1 protein M130 | CD163        | [29, 30] | M2                |
| Macrosialin                                     | CD68         | [29, 30] | M1                |
| T-lymphocyte activation antigen cd80            | CD80         | [29, 30] | M1                |
| T-lymphocyte activation antigen cd86            | CD86         | [29, 30] | M1/ M2            |
| MCH Class II Isotype                            | HLA-DMA      | [29, 30] | M1/ M2            |
| MCH Class II Isotype                            | HLA-DMB      | [29, 30] | M1/ M2            |
| MCH Class II Isotype                            | HLA-DOA      | [29, 30] | M1/ M2            |
| MCH Class II Isotype                            | HLA-DOB      | [29, 30] | M1/ M2            |
| MCH Class II Isotype                            | HLA-DPA1     | [29, 30] | M1/ M2            |
| MCH Class II Isotype                            | HLA-DPB1     | [29, 30] | M1/ M2            |
| MCH Class II Isotype                            | HLA-DQA1     | [29, 30] | M1/ M2            |
| MCH Class II Isotype                            | HLA-DQB1     | [29, 30] | M1/ M2            |
| MCH Class II Isotype                            | HLA-DRA      | [29, 30] | M1/ M2            |
| MCH Class II Isotype                            | HLA-DRB1     | [29, 30] | M1/ M2            |
| MCH Class II Isotype                            | HLA-DRB5     | [29, 30] | M1/ M2            |
| Interleukin-1 receptor type 1                   | IL1R1        | [29, 30] | M1/ M2            |
| Macrophage mannose receptor                     | MRC1         | [29, 30] | M2                |
| Macrophage scavenger receptor type 1            | MSR1         | [29, 30] | M2                |
| Nitric oxide synthase (inducible)               | NOS2         | [29, 30] | M1                |
| Suppressor of cytokine signaling 3              | SOCS3        | [29, 30] | M1                |
| Toll-like receptor 2                            | TLR2         | [29, 30] | M1                |
| Toll-like receptor 4                            | TLR4         | [29, 30] | M1                |

Table S3. Genes associated with apoptosis and proliferation (for Fig. 8).

| Gene Name                             | Abbrrev. | Function                                                                                                                                                                               | Citation |
|---------------------------------------|----------|----------------------------------------------------------------------------------------------------------------------------------------------------------------------------------------|----------|
| Bcl2-associated agonist of cell death | BAD      | Pro-apoptotic proteins via intrinsic apoptosis.                                                                                                                                        | [31]     |
| Caspase 9                             | CASP9    | Activates caspase cascades and executes apoptosis. Promotes ABL1/c-Abl-dependent DNA damage apoptosis.                                                                                 |          |
| TP53 binding protein 1                | TP53BP1  | Involved in repairing DNA double-stranded breaks.                                                                                                                                      | [32]     |
| Tyrosine-protein kinase ABL1          | ABL1     | Pro-apoptotic in presence of severe DNA damage by phosphorylating CASP9. Regulates actin remodeling.                                                                                   | [33]     |
| Cyclin-dependent kinase 1             | CDK1     | Overexpression inhibits apoptosis and drives cell proliferation and promotes survival.                                                                                                 | [34]     |
| Proliferating cell nuclear antigen    | PCNA     | Processivity factor in DNA synthesis, overexpression increases cell proliferation. Reducing PCNA can induce apoptosis. Known to have divergent properties in response to p53 mutation. | [35, 36] |

1. Lee, H.W.; Park, Y.M.; Lee, S.J.; Cho, H.J.; Kim, D.-H.; Lee, J.-I.; Kang, M.S.; Seol, J.H.; Shim, Y.M.; Nam, D.-H.; et al. Alpha-Smooth Muscle Actin (ACTA2) Is Required for Metastatic Potential of Human Lung Adenocarcinoma. *Clin. Cancer Res.* **2013**, *19*, 5879–5889, doi:10.1158/1078-0432.CCR-13-1181.
2. Ding, L.; Zhang, Z.; Shang, D.; Cheng, J.; Yuan, H.; Wu, Y. Song, X.  $\alpha$ -Smooth muscle actin-positive myofibroblasts, in association with epithelial-mesenchymal transition and lymphogenesis, is a critical prognostic parameter in patients with oral tongue squamous cell carcinoma. *J. Oral. Pathol. Med.* **2014**, *43*, 335–343, doi:10.1111/jop.12143.
3. Sudo, H.; Tsuji, A.B.; Sugyo, A.; Abe, M.; Hino, O.; Saga, T. AHNAK is highly expressed and plays a key role in cell migration and invasion in mesothelioma. *Int. J. Oncol.* **2014**, *44*, 530–538, doi:10.3892/ijo.2013.2183.
4. Chang, H.; Liu, Y.; Xue, M.; Liu, H.; Du, S.; Zhang, L.; Wang, P. Synergistic action of master transcription factors controls epithelial-to-mesenchymal transition. *Nucleic Acids Res.* **2016**, *44*, 2514–2527, doi:10.1093/nar/gkw126.
5. Zhang, L.; Ye, Y.; Long, X.; Xiao, P.; Ren, X.; Yu, J. BMP signaling and its paradoxical effects in tumorigenesis and dissemination. *Oncotarget* **2016**, *7*, 78206–78218, doi:10.18632/oncotarget.12151.
6. Bateman, A.; Martin, M.J.; O'Donovan, C.; Magrane, M.; Alpi, E.; Antunes, R. UniProt: The universal protein knowledgebase. *Nucleic Acids Res.* **2017**, *45*, D158–D169, doi:10.1093/nar/gkw1099.
7. Lamouille, S.; Xu, J.; Derynck, R. Molecular mechanisms of epithelial-mesenchymal transition. *Nat Rev Mol Cell Biol.* **2014**, *15*:178–96, doi:10.1038/nrm3758.
8. Thiery, J.P.; Acloque, H.; Huang, R.Y.J.J.; Nieto, M.A. Epithelial-Mesenchymal Transitions in Development and Disease. *Cell*, **2009**, *139*, 871–90, doi:10.1016/j.cell.2009.11.007.
9. Parsana, P.; Amend, S.R.; Hernandez, J.; Pienta, K.J.; Battle, A. Identifying global expression patterns and key regulators in epithelial to mesenchymal transition through multi-study integration. *BMC Cancer* **2017**, *17*, 447, doi:10.1186/s12885-017-3413-3.
10. Praveen Kumar, V.R.; Sehgal, P.; Thota, B.; Patil, S.; Santosh, V.; Kondaiah, P. Insulin like growth factor binding protein 4 promotes GBM progression and regulates key factors involved in EMT and invasion. *J. Neurooncol.* **2014**, *116*, 455–464, doi:10.1007/s11060-013-1324-y.
11. Argraves, W.S.; Pytela, R.; Suzuki, S.; Millán, J.L.; Pierschbacher, M.D.; Ruoslahti, E. cDNA sequences from the  $\alpha$



subunit of the fibronectin receptor predict a transmembrane domain and a short cytoplasmic peptide. *J. Biol. Chem.* **1986**, *261*, 12922–12924.

12. Dravis, C.; Spike, B.T.; Harrell, J.C.; Johns, C.; Trejo, C.L.; Southard-Smith, E.M.; Perou, C.M.; Wahl, G.M. Sox10 Regulates Stem/Progenitor and Mesenchymal Cell States in Mammary Epithelial Cells. *Cell Rep.* **2015**, *12*, 2035–2048, doi:10.1016/j.celrep.2015.08.040.
13. Lili, L.N.; Matyunina, L.V.; Walker, L.D.; Wells, S.L.; Benigno, B.B.; McDonald, J.F. Molecular profiling supports the role of epithelial-to-mesenchymal transition (EMT) in ovarian cancer metastasis. *J. Ovarian Res.* **2013**, *6*, 49, doi:10.1186/1757–2215–6–49.
14. O’Leary, N.A.; Wright, M.W.; Brister, J.R.; Ciufu, S.; Haddad, D.; McVeigh, R.; Rajput, B.; Robbertse, B.; Smith-White, B.; Ako-Adjei, D.; et al. Reference sequence (RefSeq) database at NCBI: Current status, taxonomic expansion, and functional annotation. *Nucleic Acids Res.* **2016**, *44*, D733–D745, doi:10.1093/nar/gkv1189.
15. Xiang, J.; Hu, Q.; Qin, Y.; Ji, S.; Xu, W.; Liu, W.; Shi, S.; Liang, C.; Liu, J.; Meng, Q.; et al. TCF7L2 positively regulates aerobic glycolysis via the EGLN2/HIF-1 $\alpha$  axis and indicates prognosis in pancreatic cancer. *Cell Death Dis.* **2018**, *9*, 321, doi:10.1038/s41419–018–0367–6.
16. D’Angelo, R.C.; Liu, X.-W.; Najy, A.J.; Jung, Y.S.; Won, J.; Chai, K.X.; Fridman, R.; Choi Kim, H. TIMP-1 via TWIST1 Induces EMT Phenotypes in Human Breast Epithelial Cells. *Mol. Cancer Res.* **2014**, *12*, 1324–1333, doi:10.1158/1541–7786.MCR-14–0105.
17. Tadokoro, A.; Kanaji, N.; Liu, D.; Yokomise, H.; Haba, R.; Ishii, T.; Takaji, T.; Watanabe, N.; Kita, N.; Kadowaki, N.; et al. Vimentin Regulates Invasiveness and Is a Poor Prognostic Marker in Non-small Cell Lung Cancer. *Anticancer Res.* **2016**, *36*, 1545–1551.
18. Mendez, M.G.; Kojima, S.-I.; Goldman, R.D. Vimentin induces changes in cell shape, motility, and adhesion during the epithelial to mesenchymal transition. *FASEB J.* **2010**, *24*, 1838–1851, doi:10.1096/fj.09–151639.
19. Reya, T.; Clevers, H. Wnt signalling in stem cells and cancer. *Nature* **2005**, *434*, 843–850, doi.org/10.1038/nature03319.
20. Shen, X.; Kramer, R.H. Adhesion-Mediated Squamous Cell Carcinoma Survival through Ligand-Independent Activation of Epidermal Growth Factor Receptor. *Am. J. Pathol.* **2004**, *165*, 1315–1329, doi:10.1016/S0002–9440(10)63390–1.
21. Yang, J.; Hou, Y.; Zhou, M.; Wen, S.; Zhou, J.; Xu, L.; Tang, X.; Du, Y.-E.; Hu, P.; Liu, M. Twist induces epithelial-mesenchymal transition and cell motility in breast cancer via ITGB1-FAK/ILK signaling axis and its associated downstream network. *Int. J. Biochem. Cell Biol.* **2016**, *71*, 62–71, doi:10.1016/j.biocel.2015.12.004.
22. Lin, J.; Myers, A.L.; Wang, Z.; Nancarrow, D.J.; Ferrer-Torres, D.; Handlogten, A.; Leverenz, K.; Bao, J.; Thomas, D.G.; Wang, T.D.; et al. Osteopontin (OPN/SPP1) isoforms collectively enhance tumor cell invasion and dissemination in esophageal adenocarcinoma. *Oncotarget* **2015**, *6*, 22239–22257, doi:10.18632/oncotarget.4161.
23. Guo, X.; Xu, Y.; Zhao, Z. In-depth genomic data analyses revealed complex transcriptional and epigenetic dysregulations of BRAF V600E in melanoma. *Mol. Cancer* **2015**, *14*, 1–9, doi:10.1186/s12943–015–0328-y.
24. Chowdhury, R.; Webber, J.P.; Gurney, M.; Mason, M.D.; Tabi, Z.; Clayton, A. Cancer exosomes trigger mesenchymal stem cell differentiation into pro-angiogenic and pro-invasive myofibroblasts. *Oncotarget* **2015**, *6*, 715–731, doi:10.18632/oncotarget.2711.
25. Núñez-Wehinger, S.; Ortiz, R.J.; Díaz, N.; Díaz, J.; Lobos-González, L.; Quest, A.F.G. Caveolin-1 in cell migration and metastasis. *Curr. Mol. Med.* **2014**, *14*, 255–274, doi:10.2174/1566524014666140128112827.
26. Yamasaki, T.; Seki, N.; Yoshino, H.; Itesako, T.; Hidaka, H.; Yamada, Y.; Tararano, S.; Yonezawa, T.; Kinoshita, T.; Nakagawa, M.; Enokida, H. MicroRNA-218 Inhibits Cell Migration and Invasion in Renal Cell Carcinoma through Targeting Caveolin-2 Involved in Focal Adhesion Pathway. *J. Urol.* **2013**, *190*, 1059–1068, doi:10.1016/j.juro.2013.02.089.
27. Ohashi, S.; Natsuzaka, M.; Wong, G.S.; Michaylira, C.Z.; Grugan, K.D.; Stairs, D.B.; Kalabis, J.; Vega, M.E.; Kalman, R.A.; Nakagawa M; et al. Epidermal growth factor receptor and mutant p53 expand an esophageal cellular subpopulation capable of epithelial-to-mesenchymal transition through ZEB transcription factors. *Cancer Res.* **2010**, *70*, 4174–4184, doi:10.1158/0008–5472.CAN-09–4614.
28. Xu, J.; Lamouille, S.; Derynck, R. TGF-beta-induced epithelial to mesenchymal transition. *Cell Res.* **2009**, *19*, 156–72, doi:10.1038/cr.2009.5.
29. Rószter, T.; Corporation, H.P. Understanding the Mysterious M2 Macrophage through Activation Markers and Effector Mechanisms. *Mediators Inflamm.* **2015**, *2015*, 816460, doi:10.1155/2015/816460.
30. Duluc, D.; Delneste, Y.; Tan, F.; Moles, M.; Grimaud, L.; Lenoir, J.; Preisser, L.; Anegon, I.; Catala, L.; Ifrah, N.; et al. Tumor-associated leukemia inhibitory factor and IL-6 skew monocyte differentiation into tumor-associated-

- macrophage-like cells. *Blood* **2007**, *110*, 4319–4331, doi:10.1182/blood-2007-02-072587.
31. Kiraz, Y.; Adan, A.; Kartal Yandim, M.; Baran, Y. Major apoptotic mechanisms and genes involved in apoptosis. *Tumor Biol.* **2016**, *37*, 8471–8486, doi:10.1007/s13277-016-5035-9.
  32. Callen, E.; Di Virgilio, M.; Kruhlak, M.J.; Nieto-Soler, M.; Wong, N.; Chen, H.T.; Faryabi, R.B.; Polato, F.; Santos, M.; Stranes, L.M.; et al. 53BP1 mediates productive and mutagenic DNA repair through distinct phosphoprotein interactions. *Cell* **2013**, *153*, 1266–1280, doi:10.1016/j.cell.2013.05.023.
  33. Wang, J.Y. Regulation of cell death by the Abl tyrosine kinase. *Oncogene* **2000**, *19*, 5643–5650, doi:10.1038/sj.onc.1203878.
  34. Liu, P.; Kao, T.P.; Huang, H. CDK1 promotes cell proliferation and survival via phosphorylation and inhibition of FOXO1 transcription factor. *Oncogene* **2008**, *27*, 4733–4744, doi:10.1038/onc.2008.104.
  35. Fukami-Kobayashi, J.; Mitsui, Y. Overexpression of proliferating cell nuclear antigen in mammalian cells negates growth arrest by serum starvation and cell contact. *Jpn. J. Cancer Res.* **1999**, *90*, 286–293, doi:10.1111/j.1349-7006.1999.tb00746.x.
  36. Paunesku, T.; Mittal, S.; Protić, M.; Oryhon, J.; Korolev, S.V.; Joachimiak, A.; Woloschak, G.E. Proliferating cell nuclear antigen (PCNA): Ringmaster of the genome. *Internat. J. Radiat. Biol.* **2001**, *77*, 1007–1021, doi:10.1080/09553000110069335.
